# Supplementary material
Source: PubMed Central journal article supplement (PMC2042200)

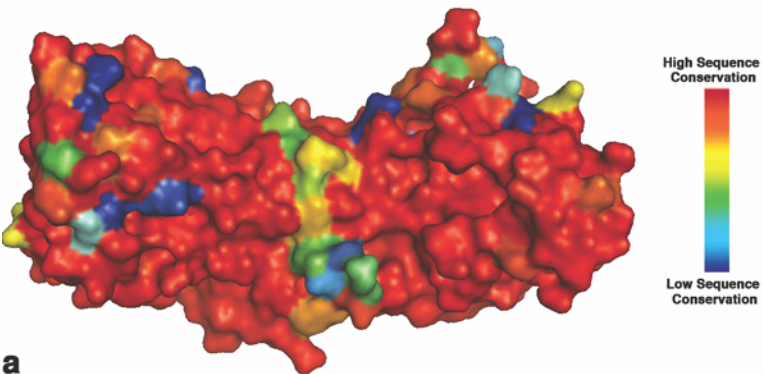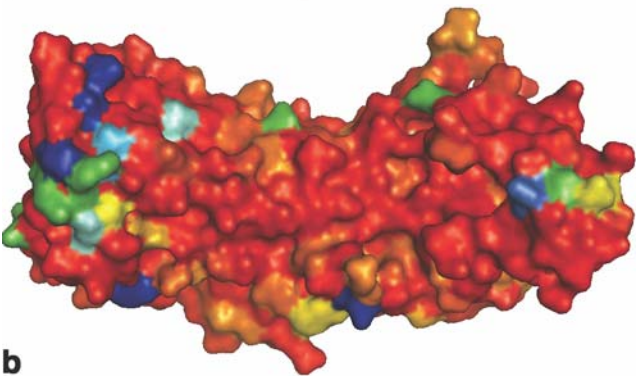

Supplement: pnas_0707447104_2.pdf [file pnas_0707447104_2.pdf]
