# Supplementary material
Source: PubMed Central journal article supplement (PMC2042200)
Supplement: pnas_0707447104_3.pdf [file pnas_0707447104_3.pdf]

60190\_m1

```

      300      310      320      330      340      350
60190_m1  P P E G G Y K D K F N N T P S O S G K X K N D K . . . . . Q E S S Q N . . . N S N T Q V I N P P N S T O K T E V Q P T Q V I D G P F A G K
Consensus_m1 P P E G G Y K D K F N N T X S O S G A K N D K N E S A K N D K Q E S S Q X X X X N S N T Q V I N P P N S G O K T E I Q P T Q V I D G P F A G X
ch2_m1m2   P P E G G Y K D K F N N T N S O S G A K N D K N E S A K N D K Q E S S Q N . . . N S N T Q V I N P P N S G O K T E I Q P T Q V I D G P F A G A
249a3_m1m2 P P E G G Y K N T T N N T P S O S X K X K N D K N E S A K N D K Q E S S Q N . . . N S N T Q V I N P P N S T O K T E I Q P T Q V I D G P F A G K
Consensus_m2 P P E G G Y K D K F N N T P S O S X K X K N D X X X X A X N D K Q D S X X X . . . X N T Q V I N P P N S X O K T E I Q P T Q V I D G P F A G X
Tx30a_m2   P P E G G Y E S K T K D N P . Q N N S K N D . . . . . A O K T E I Q P T Q V I D G P F A G K

```

60190\_m1

```

      β1      β2      β3      β4      TT      β5      β6      β7      β8      TT
      360      370      380      390      400      410      420
60190_m1  D T V V N I D R I N T K A D G T I K V G G F K A S I T T N A A H L N I G K G G V N L S N Q A S G R T L L V E N I T G N I T V D G E L R V N N Q V
Consensus_m1 D T V V N I N R R I N T N A D G T I K V G G Y K A S I T T N A A H L N I G K G G V N L S N Q A S G R S L L V E N I T G N I T V D G E L M V N N Q V
ch2_m1m2   D T V V N I N R R I N T N A D G T I R V G G Y K A S I T T N A A H L N I G K G G V N L S N Q A S G R S L L V E N I T G N I T V D G A L R V N N Q V
249a3_m1m2 D T V V N I N R R I N T N A D G T I R V G G Y K A S I T T N A A H L N I G K G G V N L S N Q A S G R S L L V E N I T G N I T V D G E L R V N N Q V
Consensus_m2 D T V V N I N R R I N T N A D G T I R V G G Y K A S I T T N A A H L N I G K G G V N L S N Q A S G R S L L V E N I T G N I T V D G A L R V N N Q V
Tx30a_m2   D T V V N I F H L N T K A D G T L R A G G F K A S I T T N A A H L N I G E G G V N L S N Q A S G R T L L V E N I T G N I T V E G L R V N N Q V

```

60190\_m1

```

      β9      β10      β11      TT      β12      β13
      430      440      450      460      470
60190_m1  G G Y A I A G S S A N F E F K A G V D T K N G T A I F N N D I S L G R F V N L K V D A H T A N E F K G . . . . .
Consensus_m1 G G Y A I A G S S A N F E F K A G V D T K N G T I F N N D I S L G R F V N L K A K A H T V N E F K G . . . . .
ch2_m1m2   G G Y A I A G S S A N F E F K A G V D T K N G T I F N N D I S L G R F V N L K A K A H T V N E F K G . . . . .
249a3_m1m2 G G Y A I A G S S A N F E F K A G V D T K N G T A I F N N D I S L G R F V N L K V D A H T A N E F K G . . . . .
Consensus_m2 G G S A I A G S S A N F E F K A G D T N N A T A I F N N D I H L K A V N R V D A H T A N E N G N I Y L G K S T N L R V N G H S A H F K N I
Tx30a_m2   G G A I A G S S A N F E F K A G D T N N A T A I F N N D I H L G K A V N R V D A H T A N E N G N I Y L G K S T N L R V N G H T A H F K N I

```

60190\_m1

```

      β14      β15      β16      TT      β17      β18
      480      490      500      510      520      530      540
60190_m1  I D T G N G G F N T . . L D F S G V T N K V N I N K L T A S T N V A V K N F N I N E L I V K T F N G V S V G E Y T H S E D I G N Q S R I N T
Consensus_m1 I D T G N G G F N T . . L D F S G V T N K V N I N K L T A S T N V A V K N F N I N E L L V K T F N G V S V G E Y T H S E D I G N Q S R I N T
ch2_m1m2   I D T G N G G F N T . . L D F S G V T N K V N I N K L T A S T N V A V K N F N I N E L L V K T F N G V S V G E Y T H S E D I G N Q S R I N T
249a3_m1m2 I D T G N G G F N T . . L D F S G V T N K V N I N K L T A S A T N V N V K N F D I R E L V T T R V Q S F G O V Y T I R E N I G D K S R I G V
Consensus_m2 D A T K S D N G E N T S X L D F S G V T N K V N I N K L T A S A T N V N I K N F D I R E L V T T R V Q S F G O V Y T I R E N I G D K S R I G V
Tx30a_m2   D A T K S D N G E N T S T L D F S G V T N K V N I N K L T A A T N V N I K N F D I R E L V T T R V Q S F G O V Y T I R E N I G D K S R I G V

```

60190\_m1

```

      TT      β19      β20      β21      TT      β22
      550      560      570      580      590      600      610
60190_m1  V R L E T G T R S I F S G G V K F K S . G E K L V I N D E I Y H A P W N Y F D A R N I K N V E I T R K F A S S T F E N P W G T S K . L M F N N L T
Consensus_m1 V R L E T G T R S I Y S G G V K F R G . G E K L V I N D E I Y A P W N Y F D A R N I K N V E I T N K L A F G P G S P W G T S K X L M F N N L T
ch2_m1m2   V R L E T G T R S I Y S G G V K F R G . G E K L V I N D E I Y A P W N Y F D A R N I K N V E I T N K L A F G P G S P W G T S K . L M F N N L T
249a3_m1m2 V S L O G F Y S P A Y S G G V T F R X X G R K L V I D E I Y H A P W N Y F D A R N I T V E N I N K R I L F G A P G N I A G K T G . L M F N N L T
Consensus_m2 V S L O G F Y S P A Y S G G V T F R X X G R K L V I D E I Y H A P W N Y F D A R N V D V E N I N K R I I F G A P G Y I A G K T G . L M F N N L T
Tx30a_m2   V S L O G F Y S P A Y S G G V T F R G . G R K L V I D E I Y H A P W N Y F D A R N V D V E N I N K R I I F G A P G Y I A G K T G . L M F N N L T

```

60190\_m1

```

      TT      β23      β24      β25      β26      TT      β27      β28      β29      η1
      620      630      640      650      660      670      680
60190_m1  I G Q N A V M D Y S Q F S N L T I O G D F I N N O G T I N Y I V R G C R V A T L N V G N A A A M F N N D I D S A T G F Y K P L I K I N S A O D
Consensus_m1 I G X N A V M D Y S Q F S N L T I O G F I N N O G T I N Y I V R G C X V A T L N V A A A M F N N D I D S A T G F Y K P L I K I N S A O D
ch2_m1m2   I N S N A S M D Y G K D L D L T I O G H F I N N O G T M N L F V O D G R V A T L N A G H Q A S M I F N N L V D S A T G F Y K P L I K I N A O N
249a3_m1m2 I N S N A S M D Y G K D L D L T I O G H F I N N O G T M N L F V O D G R V A T L N A G H Q A S M I F N N L V D S A T G F Y K P L I K I N A O N
Consensus_m2 I N S N A S M D Y G K D L D L T I O G H F I N N O G T M N L F V O D G R V A T L N A G H Q A S M I F N N L V D S A T G F Y K P L I K I N A O N
Tx30a_m2   I N S N A S M D Y G K D L D L T I O G H F I N N O G T M N L F V O D G R V A T L N A G H Q A S M I F N N L V D S T G F Y K P L I K I N A O N

```

60190\_m1

```

      β30      β31      α1      β32      β33      β34      α2
      690      700      710      720      730      740      750
60190_m1  I T K N R E H V L V K A R . . . . I T I G Y G N V S T G T N G I S N V N L E Q F K E R L A L Y N N N N R M D C V V R . N T D I K A C A G M
Consensus_m1 I T K N R E H V L V K A R X X X X X I I G E Y N V S I S N V N L E Q F K E R L A L Y N N N N R M D C V V R X X N D I K A C A G M
ch2_m1m2   I T K N R E H V L V K A R N I D Y N L V G V Q G A S Y D N I S A S N N L O E Q F K E R L A L Y N N N N R M D C V V R K D N L D I K A C A G M
249a3_m1m2 I T K N R E H V L V K A R N I D Y N L V G V Q G A S Y D N I S A S N N L O E Q F K E R L A L Y N N N N R M D C V V R K N N D I K A C A G M
Consensus_m2 I T K N R E H V L V K A R N I D Y N L V G V Q G A S Y D N I S A S N N L O E Q F K E R L A L Y N N N N R M D C V V R K N N D I K A C A G M
Tx30a_m2   I T K N R E H V L V K A R N I D Y N L V G V Q G A S Y D N I S A S N N L O E Q F K E R L A L Y N N N N R M D C V V R K D N L D I K A C A G M

```

60190\_m1

```

      α3      η2      β35      β36      β37      β38      α2
      760      770      780      790      800      810      820
60190_m1  A I G N O S M V N N P D N Y K Y L G K A W K N I G I S K T A N G S K I S V Y Y L G N S T P T E N G G N T N L P T N T N N . . . A R F A S Y
Consensus_m1 A I G N O A M V N N P D N Y K Y L G K A W K N I G I S K T A N G S K I S V Y Y L G N S T P T E N G G N T N L P T N T N N . . . A R F A S Y
ch2_m1m2   A I G D O A M V N N P D N Y K Y L G K A W K N T G I N K T A D N T I A V N L G N S T P T S S E S T N L P T N T N N . . . A R F A S Y
249a3_m1m2 A I G N O S M V N N P D S Y K Y L G K A W K N T G I N K T A N N T I A V N L G N S A P T E N G G N T D L P T N T N N . . . A R F A S Y
Consensus_m2 A I G N O S M V N N P E N Y K Y L G K A W K N T G I N K T A N N T I A V N L G N S T P T E N G G N T N L P T N T N N X X X A R F A S Y
Tx30a_m2   A I G N O S M V N N P E N Y K Y L G K A W K N T G I N K T A N N T I A V N L G N S T P T N S T T D T N L P T N T N N . . . A R F A S Y

```
